# Supplementary material
Source: MDPI journal article supplement (https://www.mdpi.com/2304-6767/5/1/10)
Supplement: s1 [file s1]

Peer-Review Record:

# Unexpected Hazards with Dental High Speed Drill

Kassahun Hailu, David Lawoyin, Alison Glascoe and Andrea Jackson

*Dent. J.* 2017, 5, 10; doi:10.3390/dj5010010

Reviewer 1: Anonymous

Reviewer 2: Anonymous

Editor: Patrick R. Schmidlin

Received: 18 October 2016; Accepted: 18 January 2017; Published: 25 January 2017

---

## First Round of Evaluation

### *Round 1: Reviewer 1 Report and Author Response*

*Report:* The article is interesting and quite well written. The unique concern is about figures: the quality of figures (both clinical than radiographic) should be improved. After this minor change the manuscript should be accepted for publication

*Response:* Hi, we tried to go through the paper and corrected the spelling error and as your suggestion about the pictures we also did enhanced all the pictures. Thank You for your patience and understanding.

### *Round 1: Reviewer 2 Report and Author Response*

*Report:* This is an interesting case report for many dental practitioners and a topic that is not regularly reported in the literature. While I am satisfied with the overall content of this manuscript, there are several areas that need some grammatical corrections e.g. verb tenses. The CASE REPORT part can be improved by condensing the information so that it avoids any repetition of details. Another aspect that requires some clarification is whether the clinician was wearing the mask correctly when the incident happened as the area of injury would typically be covered with a mask.

*Response:* Hi, we did review the entire paper and we did some modification based on your suggestion such as checking grammatical and spelling error, and we tried to minimize any unnecessary repetition and we also enhanced all pictures.

The second concern you mentioned about the dentist whether he wore a mask or not, it was mentioned in the paper and you can see it on line 65(on your numbering system)

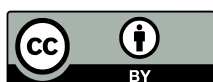

© 2016 by the authors. Submitted for possible open access publication under the terms and conditions of the Creative Commons Attribution (CC-BY) license (<http://creativecommons.org/licenses/by/4.0/>).
